# Supplementary material
Source: ML conference proceedings conference paper supplement (https://proceedings.neurips.cc/paper_files/paper/2020/hash/65ae450c5536606c266f49f1c08321f2-Abstract.html)
Supplement: Supplementary file [file 65ae450c5536606c266f49f1c08321f2-Supplemental.pdf]

## A Analysis of Existing Algorithms

Let  $f^{*,*}$  denote a function that incorporates an attacker strategy. When  $k = 0$ ,  $f^{\text{CH, IS}}(D, w_y, g_y, k)$  is the result of applying the CH inequality to the IS weighted returns, obtained from  $D$ , which additionally includes  $k$  copies of a trajectory with an IS weight of  $w_y$  and return of  $g_y$ . Notice that  $f^{*,*}$  is written in terms of IS weights. The following defines  $f^{\text{CH, WIS}}$ , written in terms of IS weights, when  $k = 0$ :

$$f^{\text{CH, WIS}}(D, w_y, g_y, 0) = \frac{1}{\sum_{i=1}^n w_i} \sum_{i=1}^n w_i g_i - b \sqrt{\frac{\ln(1/\delta)}{2n}}.$$

For the rest of the paper, we use the following notation. Let  $\mathcal{I} = \{I : \exists a \in \mathcal{A}, \exists s \in \mathcal{S}, I = \prod_{t=0}^{T-1} \pi_e(A_t = a, S_t = s) / \pi_b(A_t = a, S_t = s)\}$ , i.e., the set of all IS weights that could be obtained from policies  $\pi_e$  and  $\pi_b$ . The maximum and minimum IS weight is denoted by  $i^* = \max(\mathcal{I})$  and  $i^{\min} = \min(\mathcal{I})$ , respectively. For shorthand, let the sum of IS weights in  $D$  be written as  $\beta = \sum_{i=1}^n w_i$ . Also, we assume that  $\beta > 0$  to ensure that WIS is well-defined.

Next, we define a new term to describe how an attacker can increase the  $1 - \delta$  confidence lower bound on the mean of a bounded and real-valued random variable. We say that  $f^{*,*}$  is *adversarially monotonic given its inputs*, if an attacker can maximize  $f^{*,*}$  by maximizing the value of the added samples. For brevity, we say that  $f^{*,*}$  is adversarially monotonic.

**Definition 1.**  $f^{*,*}$  is adversarially monotonic for  $n > 1$ ,  $k > 0$ ,  $\pi_b, \pi_e$  and  $D$  if both

1. There exists two constants  $p \geq 0$  and  $q \in [0, 1]$ , with  $pq \in [0, i^*]$ , such that  $f^{*,*}(D, p, q, k) \geq f^{*,*}(D, p, q, 0)$ , i.e., adding  $k$  copies of  $pq$  does not decrease  $f$ ;
2.  $\frac{\partial}{\partial g_y} f^{*,*}(D, i^*, g_y, k) \geq 0$  and  $\frac{\partial}{\partial w_y} f^{*,*}(D, w_y, 1, k) \geq 0$ , with no local maximums, i.e.,  $f$  is a non-decreasing function w.r.t. the IS weight and return added by the attacker, respectively.

Definition 1 means that  $f^{*,*}$  is maximized when  $w_y$  and  $g_y$  is maximized. In other words, the optimal strategy is to add  $k$  copies of the trajectory with the maximum IS weight and return. Notice that  $f^{*,*}$  does not incorporate all possible attack functions,  $\mathcal{M}$ : specifically, the set of attacks, where the attacker can choose to add  $k$  different trajectories, is omitted. As described in Theorem 1, to perform a worst-case analysis, only the optimal attack must be incorporated as part of  $f^{*,*}$ .

In the following two lemmas, we show that a couple well-known Seldonian algorithms are adversarially monotonic.

**Lemma 1.** Under Assumptions 1, 2 and 3,  $f^{\text{CH, IS}}$  is adversarially monotonic.

*Proof.* Let  $w_y \geq \frac{1}{n} \sum_{i=1}^n w_i g_i + \frac{(n+k)}{k} \left( b \sqrt{\frac{\ln(1/\delta)}{2(n+k)}} - b \sqrt{\frac{\ln(1/\delta)}{2n}} \right)$  and  $g_y = 1$ . To show that  $w_y g_y \in [0, i^*]$  as stated in (1) in Definition 1, it must be that  $w_y \in [0, i^*]$ . For all  $i \in \{1, \dots, n\}$ ,  $w_i g_i \in [0, i^*]$ . Thus, for any given dataset,  $0 \leq \frac{1}{n} \sum_{i=1}^n w_i g_i \leq i^*/n$ . Using this fact, for any given  $D$ , the range of  $w_y$  is

$$\frac{1}{n} \sum_{i=1}^n (0) + \frac{(n+k)}{k} \left( b \sqrt{\frac{\ln(1/\delta)}{2(n+k)}} - b \sqrt{\frac{\ln(1/\delta)}{2n}} \right) \leq w_y \leq \frac{1}{n} \sum_{i=1}^n (i^*) + \frac{(n+k)}{k} \left( b \sqrt{\frac{\ln(1/\delta)}{2(n+k)}} - b \sqrt{\frac{\ln(1/\delta)}{2n}} \right)$$

$$\frac{b(n+k)}{k} \underbrace{\left( \sqrt{\frac{\ln(1/\delta)}{2(n+k)}} - \sqrt{\frac{\ln(1/\delta)}{2n}} \right)}_{<0} \leq w_y \leq \frac{i^*}{n} + \underbrace{\frac{b(n+k)}{k} \left( \sqrt{\frac{\ln(1/\delta)}{2(n+k)}} - \sqrt{\frac{\ln(1/\delta)}{2n}} \right)}_{<0} \leq i^*.$$

Therefore,  $w_y$  can be selected such that  $w_y g_y \in [0, i^*]$ . It follows that

$$\begin{aligned}
f^{\text{CH, IS}}(D, w_y, 1, k) &= \frac{1}{n+k} \sum_{i=1}^n w_i g_i + \frac{k}{n+k} (w_y)(1) - b \sqrt{\frac{\ln(1/\delta)}{2(n+k)}} \\
&\geq \frac{1}{n+k} \sum_{i=1}^n w_i g_i + \frac{k}{n+k} \left( \frac{1}{n} \sum_{i=1}^n w_i g_i + \frac{(n+k)}{k} \left( b \sqrt{\frac{\ln(1/\delta)}{2(n+k)}} - b \sqrt{\frac{\ln(1/\delta)}{2n}} \right) \right) - b \sqrt{\frac{\ln(1/\delta)}{2(n+k)}} \\
&= \frac{1}{n} \sum_{i=1}^n w_i g_i - b \sqrt{\frac{\ln(1/\delta)}{2n}} \\
&= f^{\text{CH, IS}}(D, w_y, g_y, 0).
\end{aligned}$$

Next, we show that (2) in Definition 1 holds.

$$\begin{aligned}
\frac{\partial}{\partial w_y} f^{*,*}(D, w_y, g_y, k) &= \frac{\partial}{\partial w_y} \left( \sum_{i=1}^n \frac{w_i g_i}{n+k} \right) + \frac{k w_y g_y}{n+k} - b \sqrt{\frac{\ln(1/\delta)}{2(n+k)}} \\
&= \frac{k g_y}{n+k} \\
\frac{\partial}{\partial w_y} f^{*,*}(D, w_y, 1, k) &= \frac{k}{n+k}. \\
\frac{\partial}{\partial g_y} f^{*,*}(D, w_y, g_y, k) &= \frac{\partial}{\partial g_y} \left( \sum_{i=1}^n \frac{w_i g_i}{n+k} \right) + \frac{k w_y g_y}{n+k} - b \sqrt{\frac{\ln(1/\delta)}{2(n+k)}} \\
&= \frac{k w_y}{n+k} \\
\frac{\partial}{\partial g_y} f^{*,*}(D, i^*, g_y, k) &= \frac{k i^*}{n+k}.
\end{aligned}$$

Notice that both partial derivatives are non-negative when  $g_y = 1$  and  $w_y = i^*$ , respectively. To find any critical points, the following equations are solved simultaneously:  $\partial/\partial g_y f^{\text{CH, WIS}}(D, w_y, g_y, k) = 0$  and  $\partial/\partial w_y f^{\text{CH, WIS}}(D, w_y, g_y, k) = 0$ . Notice that points along the line  $(w_g, 0)$  and  $(0, g_y)$  are all critical points. The following partial derivatives are computed to classify these points:

$$\begin{aligned}
\frac{\partial}{\partial (w_y)^2} (D, w_y, g_y, k) &= 0. \\
\frac{\partial}{\partial (g_y)^2} (D, w_y, g_y, k) &= 0. \\
\frac{\partial}{\partial g_y w_y} (D, w_y, g_y, k) &= \frac{k}{n+k}.
\end{aligned}$$

Using the second partial derivative test, the critical points are substituted into the following equation:

$$\frac{\partial}{\partial (w_y)^2} \cdot \frac{\partial}{\partial (g_y)^2} - \left( \frac{\partial}{\partial g_y w_y} \right)^2 = - \left( \frac{k}{n+k} \right)^2,$$

which is less than zero. Therefore, points along the line  $(w_g, 0)$  and  $(0, g_y)$  are saddle points.  $\square$

**Lemma 2.** *Under Assumptions 1 and 2,  $f^{\text{CH, WIS}}$  is adversarially monotonic.*

*Proof.* First, we show that (1) in Definition 1 holds with  $g_y = 1$  and  $w_y = 0$ .

$$\begin{aligned}
f^{\text{CH, WIS}}(D, w_y, g_y, k) &= \frac{1}{kw_y + \beta} \left( kw_y g_y + \sum_{i=1}^n w_i g_i \right) - b \sqrt{\frac{\ln(1/\delta)}{2(n+k)}} \\
f^{\text{CH, WIS}}(D, 0, 1, k) &= \frac{1}{\beta} \sum_{i=1}^n w_i g_i - b \sqrt{\frac{\ln(1/\delta)}{2(n+k)}} \\
&> \frac{1}{\beta} \sum_{i=1}^n w_i g_i - b \sqrt{\frac{\ln(1/\delta)}{2n}} \\
&= f^{\text{CH, WIS}}(D, w_y, g_y, 0),
\end{aligned} \tag{1}$$

where (1) follows from  $b \sqrt{\frac{\ln(1/\delta)}{2n}} > b \sqrt{\frac{\ln(1/\delta)}{2(n+k)}}$ . Second, we show that (2) in Definition 1 holds.

$$\begin{aligned}
\frac{\partial}{\partial w_y} f^{\text{CH, WIS}}(V, w_y, g_y, k) &= -\frac{k \sum_{i=1}^n w_i g_i}{(kw_y + \beta)^2} - \frac{k^2 w_y g_y}{(kw_y + \beta)^2} + \frac{k g_y}{(kw_y + \beta)} \\
&= -\frac{k \sum_{i=1}^n w_i g_i}{(kw_y + \beta)^2} - \frac{k^2 w_y g_y}{(kw_y + \beta)^2} + \frac{k g_y (kw_y + \beta)}{(kw_y + \beta)^2} \\
&= -\frac{k \sum_{i=1}^n w_i g_i}{(kw_y + \beta)^2} + \frac{k g_y \beta}{(kw_y + \beta)^2} \\
&= -\frac{k \sum_{i=1}^n w_i g_i}{(kw_y + \beta)^2} + \frac{k \sum_{i=1}^n w_i g_y}{(kw_y + \beta)^2} \\
&= \frac{k}{(\beta + kw_y)^2} \sum_{i=1}^n w_i (g_y - g_i) \\
\frac{\partial}{\partial w_y} f^{\text{CH, WIS}}(V, w_y, 1, k) &= \frac{k}{(\beta + kw_y)^2} \sum_{i=1}^n w_i (1 - g_i).
\end{aligned} \tag{2}$$

Notice that (2) is non-negative: 1) When  $g_y = 1$ , (2) is positive as long as there exists at least one  $g_i < 1$  for  $i \in \{1, \dots, n\}$ ; 2) If all  $g_i = 1$  in  $D$ , then (2) is zero. The following is the derivative of  $f^{\text{CH, WIS}}(D, w_y, g_y, k)$  w.r.t.  $g_y$ :

$$\begin{aligned}
\frac{\partial}{\partial g_y} f^{\text{CH, WIS}}(D, w_y, g_y, k) &= \frac{k w_y}{(\beta + k w_y)} \\
\frac{\partial}{\partial g_y} f^{\text{CH, WIS}}(D, i^*, g_y, k) &= \frac{k i^*}{(\beta + k i^*)},
\end{aligned} \tag{3}$$

which is also non-negative. To find any critical points, the following equations are solved simultaneously:  $\partial/\partial g_y f^{\text{CH, WIS}}(D, w_y, g_y, k) = 0$  and  $\partial/\partial w_y f^{\text{CH, WIS}}(D, w_y, g_y, k) = 0$ . Notice that (3) is zero when  $w_y = 0$ . Plugging  $w_y = 0$  into  $\partial/\partial w_y f^{\text{CH, WIS}}(D, w_y, g_y, k) = 0$ , and then solving for  $g_y$ , yields the  $x$  coordinate of a critical point.

$$\begin{aligned}
\frac{k}{(\beta + k(0))^2} \sum_{i=1}^n w_i (g_y - g_i) &= 0 \\
\frac{k}{\beta^2} \sum_{i=1}^n w_i (g_y - g_i) &= 0 \\
g_y \sum_{i=1}^n w_i - \sum_{i=1}^n w_i g_i &= 0 \\
g_y &= \frac{\sum_{i=1}^n w_i g_i}{\beta}.
\end{aligned}$$

The following partial derivatives are computed to classify whether  $(0, \sum_{i=1}^n w_i g_i / \beta)$  is a minimum, maximum or saddle point:

$$\begin{aligned}\frac{\partial}{\partial(w_y)^2}(D, w_y, g_y, k) &= \frac{-2k^2}{(\beta + kw_y)^3} \sum_{i=1}^n w_i (g_y - g_i). \\ \frac{\partial}{\partial(g_y)^2}(D, w_y, g_y, k) &= 0. \\ \frac{\partial}{\partial g_y w_y}(D, w_y, g_y, k) &= \frac{\partial}{\partial w_y} \frac{k w_y}{(\beta + k w_y)} \\ &= \frac{k \beta}{(\beta + k w_y)^2}.\end{aligned}$$

Using the second partial derivative test, the critical point is substituted into the following equation:

$$\begin{aligned}\frac{\partial}{\partial(w_y)^2} \cdot \frac{\partial}{\partial(g_y)^2} - \left( \frac{\partial}{\partial g_y w_y} \right)^2 &= 0 - \left( \frac{k \beta}{(\beta + k(0))^2} \right)^2 \\ &= - \left( \frac{k \beta}{\beta^2} \right)^2,\end{aligned}$$

which is less than zero. Therefore,  $(w_y = 0, g_y = \sum_{i=1}^n w_i g_i / \beta)$  is a saddle point.  $\square$

Next, we describe the trajectory that must be added to  $D$  to execute the optimal attack.

**Definition 2 (Optimal Attack).** An optimal attack strategy for  $k > 0$  is to select

$$\arg \max_{H \in \mathcal{H}_{\pi_e}} f^{*,*}(D, w_y = w(H, \pi_e, \pi_b), g_y = g(H), k).$$

**Definition 3 (Optimal Trajectory).** Given that a maximum exists, let  $(a', s') \in \arg \max_{a \in \mathcal{A}, s \in \mathcal{S}} \frac{\pi_e(a, s)}{\pi_b(a, s)}$ .

If  $\frac{\pi_e(a, s)}{\pi_b(a, s)} > 1$ , let  $H^* = \{S_0 = s', A_0 = a', R_0 = 1, \dots, S_{\tau-1} = s', A_{\tau-1} = a', R_{\tau-1} = 1\}$ . Otherwise, let  $H^* = \{S_0 = s', A_0 = a', R_0 = 1\}$ .

**Theorem 1.** For any adversarially monotonic off-policy estimator, the optimal attack strategy is to add  $k$  repetitions of  $H^*$  to  $D$ .

*Proof.* An optimal attack strategy is equivalent to

$$\arg \max_{H \in \mathcal{H}_{\pi_e}} f^{*,*}(D, w(H, \pi_e, \pi_b), g(H), k) = \arg \max_{i^* \in \mathcal{I}, g^* \in [0, 1]} f^{*,*}(D, i^*, g^*, k).$$

For any off-policy estimator that is adversarially monotonic, by (1) of Definition 1, there exists a  $pq$  such that

$$f^{*,*}(D, p, q, k) \geq f^{*,*}(D, p, q, 0).$$

A return that maximizes  $f^{*,*}(D, w_y, g_y, k)$  implies that

$$\max_{g^* \in [0, 1]} f^{*,*}(D, p, g^*, k) \geq f^{*,*}(D, p, q, k).$$

$f^{\text{CH, IS}}$  and  $f^{\text{CH, WIS}}$  are non-decreasing w.r.t. the return. Therefore,

$$\arg \max_{g^* \in [0, 1]} f^{*,*}(D, p, g^*, k) = \max_{g^* \in [0, 1]} g^*.$$

Setting  $g^* = 1$ , an importance weight that maximizes  $f^{*,*}(D, w_y, 1, k)$  implies that

$$\max_{i^* \in \mathcal{I}} f^{*,*}(D, i^*, 1, k) \geq f^{*,*}(D, p, 1, k).$$

$f^{\text{CH, IS}}$  and  $f^{\text{CH, WIS}}$  are also non-decreasing w.r.t. the importance weight. So,

$$\arg \max_{i^* \in \mathcal{I}} f^{*,*}(D, i^*, 1, k) = \max_{i^* \in \mathcal{I}} i^*.$$

Since the IS weight is a product of ratios over the length of a trajectory, the ratio at a single time step is maximized.

$$\begin{aligned} \max_{i^* \in \mathcal{I}} i^* &= \max_{a \in \mathcal{A}, s \in \mathcal{S}} \prod_{t=0}^{\tau-1} \frac{\pi_e(A_t = a, S_t = s)}{\pi_b(A_t = a, S_t = s)} \\ &= \begin{cases} \left( \max_{a \in \mathcal{A}, s \in \mathcal{S}} \frac{\pi_e(a, s)}{\pi_b(a, s)} \right)^\tau & \text{if } \max_{a \in \mathcal{A}, s \in \mathcal{S}} \frac{\pi_e(a, s)}{\pi_b(a, s)} > 1, \\ \max_{a \in \mathcal{A}, s \in \mathcal{S}} \frac{\pi_e(a, s)}{\pi_b(a, s)} & \text{otherwise.} \end{cases} \end{aligned}$$

To create  $H^*$ , if the ratio at a single time step is greater than 1,  $a'$  and  $s'$  is repeated for the maximum length of the trajectory,  $\tau$ ; otherwise,  $a'$  and  $s'$  is repeated only for a single time step. Thus,  $H^*$  represents the trajectory with the largest return and importance weight.  $\square$

Next, we show how Equations (2) and (1), that define quasi- $\alpha$ -security and  $\alpha$ -security, respectively, apply to  $L^{*,*}$ . Specifically, we show that a safety test using  $L^{*,*}$  as a metric is a valid safety test that first predicts the performance of  $\pi_e$  using  $D$ , and then bounds the predicted performance with high probability. If  $L^{*,*}(\pi_e, D) > J(\pi_b)$ , the safety test returns True; otherwise it returns False.

**Lemma 3.** *A safety test using  $L^{*,*}$  is quasi- $\alpha$ -secure if  $\forall m \in \mathcal{M}, \Pr \left( L^{*,*}(\pi_e, m(D, k)) > J(\pi_b) + \alpha \right) \leq \Pr \left( L^{*,*}(\pi_e, D) > J(\pi_b) \right)$ .*

*Proof.* For  $x \in \mathbb{N}^+$ , let  $\mathcal{P} : \Pi \times D_n^{\pi_b} \rightarrow \mathbb{R}^x$  denote any function to predict the performance of some  $\pi_e \in \Pi$ , using data  $D$  collected from  $\pi_b$ . Also, let  $\mathcal{B} : \mathbb{R}^x \times [0, 1] \rightarrow \mathbb{R}$  denote any function that bounds performance with high probability,  $1 - \delta$ , where  $\delta \in [0, 1]$ . Starting with the definition of quasi- $\alpha$ -security, we have that  $\forall m \in \mathcal{M}$ ,

$$\begin{aligned} \Pr \left( \varphi(\pi_e, m(D, k), J(\pi_b) + \alpha) = \text{True} \right) &\leq \Pr \left( \varphi(\pi_e, D, J(\pi_b)) = \text{True} \right) \\ &\iff \Pr \left( \mathcal{B}(\mathcal{P}(\pi_e, m(D, k)), \delta) > J(\pi_b) + \alpha \right) \leq \Pr \left( \mathcal{B}(\mathcal{P}(\pi_e, D), \delta) > J(\pi_b) \right) \\ &\iff \Pr \left( L^{*,*}(\pi_e, m(D, k)) > J(\pi_b) + \alpha \right) \leq \Pr \left( L^{*,*}(\pi_e, D) > J(\pi_b) \right). \end{aligned}$$

$\square$

**Lemma 4.** *A safety test using  $L^{*,*}$  is  $\alpha$ -secure if  $\forall m \in \mathcal{M}, \Pr \left( L^{*,*}(\pi_e, m(D, k)) > J(\pi_b) + \alpha \right) < \delta$ .*

*Proof.* For  $x \in \mathbb{N}^+$ , let  $\mathcal{P} : \Pi \times D_n^{\pi_b} \rightarrow \mathbb{R}^x$  denote any function to predict the performance of some  $\pi_e \in \Pi$ , using data  $D$  collected from  $\pi_b$ . Also, let  $\mathcal{B} : \mathbb{R}^x \times [0, 1] \rightarrow \mathbb{R}$  denote any function that bounds performance with high probability,  $1 - \delta$ , where  $\delta \in [0, 1]$ . Starting with the definition of  $\alpha$ -security, we have that  $\forall m \in \mathcal{M}$ ,

$$\begin{aligned} \Pr \left( \varphi(\pi_e, m(D, k), J(\pi_b) + \alpha) = \text{True} \right) &< \delta \\ &\iff \Pr \left( \mathcal{B}(\mathcal{P}(\pi_e, m(D, k)), \delta) > J(\pi_b) + \alpha \right) < \delta \\ &\iff \Pr \left( L^{*,*}(\pi_e, m(D, k)) > J(\pi_b) + \alpha \right) < \delta. \end{aligned}$$

$\square$

In Lemma 5, we describe a condition that must hold in order to compute a valid  $\alpha$ . The condition states that a valid  $\alpha$  must be equal to or greater than the largest increase in the  $1 - \delta$  confidence lower bound on  $J(\pi_e)$  across all datasets  $D \in \mathcal{D}_n^{\pi_b}$  and all attack strategies (i.e., the optimal attack).

**Lemma 5.** *A safety test using  $L^{*,*}$  is quasi- $\alpha$ -secure or  $\alpha$ -secure if  $\forall D \in \mathcal{D}_n^{\pi_b}$  and  $\forall m \in \mathcal{M}, L^{*,*}(\pi_e, m(D, k)) \leq L^{*,*}(\pi_e, D) + \alpha$ .*

*Proof.* If  $L^{*,*}(\pi_e, m(D, k)) \leq L^{*,*}(\pi_e, D) + \alpha$ , then

$$L^{*,*}(\pi_e, D) \geq L^{*,*}(\pi_e, m(D, k)) - \alpha. \quad (4)$$

A safety test checks whether  $L^{*,*}(\pi_e, D) > J(\pi_b)$ . When (4) holds  $\forall D \in \mathcal{D}_n^{\pi_b}$  and  $\forall m \in \mathcal{M}$ ,

$$\Pr(L^{*,*}(\pi_e, D) > J(\pi_b)) \geq \Pr(L^{*,*}(\pi_e, m(D, k)) - \alpha > J(\pi_b)), \quad (5)$$

and hence via algebra that

$$\Pr(L^{*,*}(\pi_e, m(D, k)) > J(\pi_b) + \alpha) \leq \Pr(L^{*,*}(\pi_e, D) > J(\pi_b)),$$

which, by Lemma (3), implies that a safety test using  $L^{*,*}$  is quasi- $\alpha$ -secure. In the case of  $\alpha$ -security, by Assumption 3, we require a ‘‘safe’’ safety test. That is,

$$\Pr(L^{*,*}(\pi_e, D) > J(\pi_b)) < \delta. \quad (6)$$

From the transitive property of  $\geq$ , we can conclude from (5) and (6) that

$$\Pr(L^{*,*}(\pi_e, m(D, k)) - \alpha > J(\pi_b)) < \delta,$$

and hence via algebra that

$$\Pr(L^{*,*}(\pi_e, m(D, k)) > J(\pi_b) + \alpha) < \delta,$$

which, by Lemma (4), implies that a safety test using  $L^{*,*}$  is  $\alpha$ -secure.  $\square$

## B Proof of Theorem 1

The result of (5) for the estimator that uses CH and IS is the following:

$$\begin{aligned} \alpha' &= \max_{D \in \mathcal{D}_n^H} f^{\text{CH, IS}}(D, i^*, 1, k) - L^{\text{CH, IS}}(\pi_e, D) \\ &= \max_{D \in \mathcal{D}_n^H} \frac{1}{n+k} \sum_{i=1}^n w_i g_i + \frac{k}{n+k} (i^*)(1) - b \sqrt{\frac{\ln(1/\delta)}{2(n+k)}} - \left( \frac{1}{n} \sum_{i=1}^n w_i g_i - b \sqrt{\frac{\ln(1/\delta)}{2n}} \right) \\ &= \max_{D \in \mathcal{D}_n^H} b \sqrt{\frac{\ln(1/\delta)}{2n}} - b \sqrt{\frac{\ln(1/\delta)}{2(n+k)}} + \frac{k}{(n+k)} \left( i^* - \frac{\sum_{i=1}^n w_i g_i}{n} \right). \end{aligned}$$

Recall that  $b$  represents the upper bound of all IS weighted returns. Let  $b = i^*$ , and  $g_i = 0$  for all  $i \in \{1, \dots, n\}$ .

$$\begin{aligned} \alpha' &= i^* \sqrt{\frac{\ln(1/\delta)}{2n}} - i^* \sqrt{\frac{\ln(1/\delta)}{2(n+k)}} + \frac{k}{(n+k)} (i^* - 0) \\ &= i^* \left( \sqrt{\frac{\ln(1/\delta)}{2n}} - \sqrt{\frac{\ln(1/\delta)}{2(n+k)}} + \frac{k}{(n+k)} \right). \end{aligned}$$

The result of (5) for the estimator that uses CH and WIS is the following:

$$\begin{aligned} \alpha' &= \max_{D \in \mathcal{D}_n^H} f^{\text{CH, WIS}}(D, i^*, 1, k) - L^{\text{CH, WIS}}(\pi_e, D) \\ &= \max_{D \in \mathcal{D}_n^H} \frac{1}{ki^* + \sum_{i=1}^n w_i} \left( \sum_{i=1}^n w_i g_i + k(i^*)(1) \right) - b \sqrt{\frac{\ln(1/\delta)}{2(n+k)}} - \left( \frac{1}{\sum_{i=1}^n w_i} \sum_{i=1}^n w_i g_i - b \sqrt{\frac{\ln(1/\delta)}{2n}} \right) \\ &= \max_{D \in \mathcal{D}_n^H} b \sqrt{\frac{\ln(1/\delta)}{2n}} - b \sqrt{\frac{\ln(1/\delta)}{2(n+k)}} + \frac{ki^*}{(ki^* + \beta)} \left( 1 - \frac{\sum_{i=1}^n w_i g_i}{\beta} \right). \end{aligned}$$

Let  $g_i = 0$  for all  $i \in \{1, \dots, n\}$ . Also, notice that  $b = 1$  because importance weighted returns are in range  $[0, 1]$  for WIS.

$$\alpha' = \max_{D \in \mathcal{D}_n^H} \sqrt{\frac{\ln(1/\delta)}{2n}} - \sqrt{\frac{\ln(1/\delta)}{2(n+k)}} + \frac{ki^*}{(ki^* + \beta)}.$$

Recall that  $\beta \neq 0$ . So, let  $w_i = 0$  for all  $i \in \{1, \dots, n-1\}$  and  $w_n = i^{\min}$ .

$$\alpha' = \sqrt{\frac{\ln(1/\delta)}{2n}} - \sqrt{\frac{\ln(1/\delta)}{2(n+k)}} + \frac{ki^*}{(i^{\min} + ki^*)}.$$

## C Panacea: An Algorithm for Safe and Secure Policy Improvement

Table 1:  $\alpha$ -security of Panacea.

| Estimator | $\alpha$                                                                                                |
|-----------|---------------------------------------------------------------------------------------------------------|
| CH, IS    | $c\left(\sqrt{\frac{\ln(1/\delta)}{2n}} - \sqrt{\frac{\ln(1/\delta)}{2(n+k)}} + \frac{k}{(n+k)}\right)$ |
| CH, WIS   | $\sqrt{\frac{\ln(1/\delta)}{2n}} - \sqrt{\frac{\ln(1/\delta)}{2(n+k)}} + \frac{kc}{(i^{\min} + kc)}$    |

---

### Algorithm 1 Panacea( $D, \pi_e, \alpha, k$ )

---

- 1: Compute  $c$ , using  $\alpha$  and  $k$ , given estimator
  - 2: **for**  $H \in D$  **do**
  - 3:     **if** IS weight computed using  $H$  is greater than  $c$  **then**
  - 4:         Set IS weight to  $c$
  - 5: **return** clipped  $D$
- 

### C.1 Proof of Corollary 1

Let  $\alpha'$  and  $k'$  denote the user-specified inputs to Panacea. Based on Table 1,  $c^{\text{CH, IS}} = \alpha' / \left(\sqrt{\frac{\ln(1/\delta)}{2n}} - \sqrt{\frac{\ln(1/\delta)}{2(n+k)}} + \frac{k}{(n+k)}\right)$  if  $k' = k$ . Recall that  $b$  is the upper bound on all IS weighted returns. Due to clipping,  $b = c^{\text{CH, IS}}$ , and let  $g_i = 0$  for all  $i \in \{1, \dots, n\}$ . The result of (6) for the estimator that uses CH and IS is the following:

$$\begin{aligned}
& \max_{D \in \mathcal{D}_n^H} f^{\text{CH, IS}}(\text{Panacea}(D, c^{\text{CH, IS}}), c^{\text{CH, IS}}, 1, k) - L^{\text{CH, IS}}(\pi_e, \text{Panacea}(D, c^{\text{CH, IS}})) \\
&= \max_{D \in \mathcal{D}_n^H} \frac{1}{n+k} \sum_{i=1}^n w_i g_i + \frac{k}{n+k} (c^{\text{CH, IS}})(1) - b \sqrt{\frac{\ln(1/\delta)}{2(n+k)}} - \left( \frac{1}{n} \sum_{i=1}^n w_i g_i - b \sqrt{\frac{\ln(1/\delta)}{2n}} \right) \\
&= \max_{D \in \mathcal{D}_n^H} b \sqrt{\frac{\ln(1/\delta)}{2n}} - b \sqrt{\frac{\ln(1/\delta)}{2(n+k)}} + \frac{k}{(n+k)} \left( c^{\text{CH, IS}} - \frac{\sum_{i=1}^n w_i g_i}{n} \right) \\
&= c^{\text{CH, IS}} \sqrt{\frac{\ln(1/\delta)}{2n}} - c^{\text{CH, IS}} \sqrt{\frac{\ln(1/\delta)}{2(n+k)}} + \frac{k}{(n+k)} (c^{\text{CH, IS}} - 0) \\
&= c^{\text{CH, IS}} \left( \sqrt{\frac{\ln(1/\delta)}{2n}} - \sqrt{\frac{\ln(1/\delta)}{2(n+k)}} + \frac{k}{(n+k)} \right) \\
&= \frac{\alpha'}{\sqrt{\frac{\ln(1/\delta)}{2n}} - \sqrt{\frac{\ln(1/\delta)}{2(n+k)}} + \frac{k}{(n+k)}} \cdot \left( \sqrt{\frac{\ln(1/\delta)}{2n}} - \sqrt{\frac{\ln(1/\delta)}{2(n+k)}} + \frac{k}{(n+k)} \right) \\
&= \alpha'.
\end{aligned}$$

For WIS, recall that no matter how the clipping weight is set,  $b \leq 1$  because importance weighted returns are in range  $[0, 1]$ , and  $\beta \neq 0$ . So, let  $w_i = 0$  for all  $i \in \{1, \dots, n-1\}$  and  $w_n = i^{\min}$ . Also, let  $g_i = 0$  for all  $i \in \{1, \dots, n\}$ . Based on Table 1,  $c^{\text{CH, WIS}} = i^{\min} \left( \alpha' - \sqrt{\frac{\ln(1/\delta)}{2n}} + \sqrt{\frac{\ln(1/\delta)}{2(n+k)}} \right) / k \left( 1 - \alpha' + \sqrt{\frac{\ln(1/\delta)}{2n}} - \sqrt{\frac{\ln(1/\delta)}{2(n+k)}} \right)$  if  $k' = k$ . The result of (6) for the estimator that uses

CH and WIS is the following:

$$\begin{aligned}
& \max_{D \in \mathcal{D}_n^H} f^{\text{CH, WIS}}(\text{Panacea}(D, c^{\text{CH, WIS}}), c^{\text{CH, WIS}}, 1, k) - L^{\text{CH, WIS}}(\pi_e, \text{Panacea}(D, c^{\text{CH, WIS}})) \\
&= \max_{D \in \mathcal{D}_n^H} \frac{1}{kc^{\text{CH, WIS}} + \sum_{i=1}^n w_i} \left( \sum_{i=1}^n w_i g_i + k(c^{\text{CH, WIS}})(1) \right) - b \sqrt{\frac{\ln(1/\delta)}{2(n+k)}} - \left( \frac{1}{\sum_{i=1}^n w_i} \sum_{i=1}^n w_i g_i - b \sqrt{\frac{\ln(1/\delta)}{2n}} \right) \\
&= \max_{D \in \mathcal{D}_n^H} b \sqrt{\frac{\ln(1/\delta)}{2n}} - b \sqrt{\frac{\ln(1/\delta)}{2(n+k)}} + \frac{kc^{\text{CH, WIS}}}{(kc^{\text{CH, WIS}} + \beta)} \left( 1 - \frac{\sum_{i=1}^n w_i g_i}{\beta} \right) \\
&\leq \sqrt{\frac{\ln(1/\delta)}{2n}} - \sqrt{\frac{\ln(1/\delta)}{2(n+k)}} + \frac{kc^{\text{CH, WIS}}}{(kc^{\text{CH, WIS}} + i^{\min})} \\
&= \left( \sqrt{\frac{\ln(1/\delta)}{2n}} - \sqrt{\frac{\ln(1/\delta)}{2(n+k)}} \right) + \frac{\left( \alpha' - \sqrt{\frac{\ln(1/\delta)}{2n}} + \sqrt{\frac{\ln(1/\delta)}{2(n+k)}} \right)}{\left( \alpha' - \sqrt{\frac{\ln(1/\delta)}{2n}} + \sqrt{\frac{\ln(1/\delta)}{2(n+k)}} \right) + \left( 1 - \alpha' + \sqrt{\frac{\ln(1/\delta)}{2n}} - \sqrt{\frac{\ln(1/\delta)}{2(n+k)}} \right)} \\
&= \sqrt{\frac{\ln(1/\delta)}{2n}} - \sqrt{\frac{\ln(1/\delta)}{2(n+k)}} + \alpha' - \sqrt{\frac{\ln(1/\delta)}{2n}} + \sqrt{\frac{\ln(1/\delta)}{2(n+k)}} \\
&= \alpha'.
\end{aligned}$$

## C.2 Proof of Corollary 2

Let  $\alpha$  and  $k'$  denote the user-specified inputs to Panacea. If  $k' = k$ , i.e., the user inputs the correct number of trajectories added by the attacker, the result of (6) for the estimator that uses CH and IS is the following:

$$\begin{aligned}
\alpha &= \max_{D \in \mathcal{D}_n^H} f^{\text{CH, IS}}(\text{Panacea}(D, c), c, 1, k) - L^{\text{CH, IS}}(\pi_e, \text{Panacea}(D, c)) \\
\alpha &= c \left( \sqrt{\frac{\ln(1/\delta)}{2n}} - \sqrt{\frac{\ln(1/\delta)}{2(n+k)}} + \frac{k}{(n+k)} \right) \\
c &= \frac{\alpha}{\left( \sqrt{\frac{\ln(1/\delta)}{2n}} - \sqrt{\frac{\ln(1/\delta)}{2(n+k)}} + \frac{k}{(n+k)} \right)}.
\end{aligned}$$

If  $k' = k$ , the result of (6) for the estimator that uses CH and WIS is the following:

$$\max_{D \in \mathcal{D}_n^H} f^{\text{CH, WIS}}(\text{Panacea}(D, c), c, 1, k) - L^{\text{CH, WIS}}(\pi_e, \text{Panacea}(D, c)) \leq \sqrt{\frac{\ln(1/\delta)}{2n}} - \sqrt{\frac{\ln(1/\delta)}{2(n+k)}} + \frac{kc}{(kc + i^{\min})}. \quad (7)$$

Setting the right-hand side of (7) to  $\alpha$ , and solving for  $c$  equals:

$$\begin{aligned}
\alpha &= \sqrt{\frac{\ln(1/\delta)}{2n}} - \sqrt{\frac{\ln(1/\delta)}{2(n+k)}} + \frac{kc}{(i^{\min} + kc)} \\
\frac{kc}{(i^{\min} + kc)} &= \alpha - \sqrt{\frac{\ln(1/\delta)}{2n}} + \sqrt{\frac{\ln(1/\delta)}{2(n+k)}} \\
kc - kc\alpha + kc \sqrt{\frac{\ln(1/\delta)}{2n}} - kc \sqrt{\frac{\ln(1/\delta)}{2(n+k)}} &= i^{\min} \alpha - i^{\min} \sqrt{\frac{\ln(1/\delta)}{2n}} + i^{\min} \sqrt{\frac{\ln(1/\delta)}{2(n+k)}} \\
kc \left( 1 - \alpha + \sqrt{\frac{\ln(1/\delta)}{2n}} - \sqrt{\frac{\ln(1/\delta)}{2(n+k)}} \right) &= i^{\min} \alpha - i^{\min} \sqrt{\frac{\ln(1/\delta)}{2n}} + i^{\min} \sqrt{\frac{\ln(1/\delta)}{2(n+k)}} \\
c &= \frac{i^{\min} \left( \alpha - \sqrt{\frac{\ln(1/\delta)}{2n}} + \sqrt{\frac{\ln(1/\delta)}{2(n+k)}} \right)}{k \left( 1 - \alpha + \sqrt{\frac{\ln(1/\delta)}{2n}} - \sqrt{\frac{\ln(1/\delta)}{2(n+k)}} \right)}.
\end{aligned}$$
